# Supplementary material for: Low c-Kit expression identifies primitive, therapy-resistant CML stem cells
Source: PubMed Central journal article supplement (PMC9870079; doi:10.1172/jci.insight.157421), 2023-01-10
Supplement: jciinsight-8-157421-s067.pdf [file jciinsight-8-157421-s067.pdf]

## Supplementary Information

### Supplementary Methods Table

| REAGENT or RESOURCE    | SOURCE                          | IDENTIFIER                        |
|------------------------|---------------------------------|-----------------------------------|
| <b>Antibodies</b>      |                                 |                                   |
| Anti-mouse CD3         | Thermo Fisher Scientific        | Cat#13-0031-85; RRID:AB_466320    |
| Anti-mouse CD4         | Thermo Fisher Scientific        | Cat#13-0041-85; RRID:AB_466326    |
| Anti-mouse CD8         | Thermo Fisher Scientific        | Cat#13-0083-85; RRID:AB_657763    |
| Anti-mouse B220        | Thermo Fisher Scientific        | Cat#13-0452-85; RRID:AB_466450    |
| Anti-mouse CD19        | Thermo Fisher Scientific        | Cat#13-0193-85; RRID:AB_657658    |
| Anti-mouse IgM         | Thermo Fisher Scientific        | Cat#13-5790-85; RRID:AB_466676    |
| Anti-mouse Gr-1        | Thermo Fisher Scientific        | Cat#13-5931-85; RRID:AB_466801    |
| Anti-mouse CD11b       | Thermo Fisher Scientific        | Cat#13-0112-85; RRID:AB_466360    |
| Anti-mouse NK1.1       | Thermo Fisher Scientific        | Cat#13-5941-85; RRID:AB_466805    |
| Anti-mouse Ter119      | Thermo Fisher Scientific        | Cat#13-5921-85; RRID:AB_466798    |
| Anti-mouse CD45.1      | Thermo Fisher Scientific        | Cat#25-0453-82; RRID:AB_469629    |
| Anti-mouse CD45.2      | Thermo Fisher Scientific        | Cat#11-0454-85; RRID:AB_465062    |
| Anti-mouse CD3         | Thermo Fisher Scientific        | Cat#100218; RRID:AB_1595492       |
| Anti-mouse CD19        | Thermo Fisher Scientific        | Cat#17-0193-82; RRID:AB_1659676   |
| Anti-mouse Ter119      | Thermo Fisher Scientific        | Cat#116220; RRID:AB_528963        |
| Anti-mouse B220        | Thermo Fisher Scientific        | Cat#56-0452-82; RRID:AB_891458    |
| Anti-mouse CD11b       | Thermo Fisher Scientific        | Cat#47-0112-82; RRID:AB_1603193   |
| Anti-mouse Gr-1        | Thermo Fisher Scientific        | Cat#12-5931-83; RRID:AB_466046    |
| Streptavidin           | BioLegend                       | Cat#405229                        |
| Anti-mouse CD45        | Thermo Fisher Scientific        | Cat#56-0451-82; RRID:AB_891454    |
| Anti-mouse CD16/32     | Thermo Fisher Scientific        | Cat#56-0161-82; RRID:AB_493994    |
| Anti-mouse CD117       | Biolegend                       | ca#105826; RRID:AB_1626278        |
| Anti-mouse Sca-1       | Biolegend                       | Cat#12-5981-82; RRID:AB_493596    |
| Anti-mouse CD48        | Thermo Fisher Scientific        | Cat#17-0481-82; RRID:AB_469408    |
| Anti-mouse CD150       | BioLegend                       | Cat#115922; RRID:AB_2303663       |
| Anti-mouse CD150       | Thermo Fisher Scientific        | Cat#12-1502-82; RRID:AB_1548765   |
| Anti-mouse CD34        | Thermo Fisher Scientific        | Cat#50-0341-82; RRID:AB_10596826  |
| Anti-mouse Flt3        | Thermo Fisher Scientific        | Cat# 15-1351-82, RRID:AB_494219   |
| Anti-mouse CD127       | BD Biosciences                  | Cat# 562419, RRID:AB_11153131     |
| Anti-mouse CD105       | Biolegend                       | Cat# 120411, RRID:AB_1877185      |
| Anti-mouse CD41        | BD Biosciences                  | Cat# 740136, RRID:AB_2739892      |
| Anti-mouse CD71        | BD Biosciences                  | Cat# 553266, RRID:AB_394743       |
| Anti-mouse Ter119      | Thermo Fisher Scientific        | Cat# 15-5921-82, RRID:AB_468810   |
| Anti-mouse CD45.1      | BioLegend                       | Cat# 110727, RRID:AB_893348       |
| Anti-mouse CD45.2      | Thermo Fisher Scientific        | Cat# 17-0454-82, RRID:AB_469400   |
| Anti-mouse CD45.1      | BioLegend                       | Cat# 110723, RRID:AB_493732       |
| Anti-Ki67              | Thermo Fisher Scientific        | Cat#11-5698-80; RRID:AB_11151689  |
| Phospho-Stat5 (Tyr694) | Cell Signaling Technology (CST) | Cat# 5387                         |
| Anti-human CD45        | Thermo Fisher Scientific        | Cat # 47-0459-42; RRID:AB_1944368 |
| Anti-human CD34        | Thermo Fisher Scientific        | Cat# 17-0349-42; RRID:AB_2016672  |
| Anti-human CD38        | Thermo Fisher Scientific        | Cat # 12-0388-42; RRID:AB_1518748 |
| Anti-human CD90        | Thermo Fisher Scientific        | Cat # 45-0909-42; RID:AB_10718245 |

|                                                      |                             |                                   |
|------------------------------------------------------|-----------------------------|-----------------------------------|
| Anti-human CD45RA                                    | Thermo Fisher Scientific    | Cat # 25-0458-42; RRID:AB_1548774 |
| Anti-human CD117 (c-Kit)                             | Thermo Fisher Scientific    | Cat # 11-1178-42; RRID:AB_2572472 |
| <b>Chemicals, Peptides, and Recombinant Proteins</b> |                             |                                   |
| Collagenase II                                       | Sigma-Aldrich               | Cat# C1764                        |
| Dispase II                                           | Sigma-Aldrich               | Cat#4942078001                    |
| DNase I                                              | Sigma-Aldrich               | Cat#D4263                         |
| BSA                                                  | Sigma-Aldrich               | Cat#A9418                         |
| DAPI                                                 | Thermo Fisher Scientific    | Cat#D1306; RRID:AB_2629482        |
| Fixable Viability Dye eFluor™ 450                    | Thermo Fisher Scientific    | Cat#65-0863-14                    |
| <b>Critical Commercial Assays</b>                    |                             |                                   |
| Quantikine SCF Elisa Kit                             | R&D                         | cat# MCK00                        |
| RNeasy Micro Kit                                     | QIAGEN                      | Cat#74004                         |
| Direct Lineage Cell Depletion Kit                    | Miltenyi Biotech            | Cat#130-110-470                   |
| Nextera XT DNA Library Preparation Kit               | Illumina                    | Cat#FC-131-1096                   |
| SMART-Seq v4 Ultra Low Input RNA Kit                 | Takara Bio                  | Cat#634891                        |
| <b>Deposited Data</b>                                |                             |                                   |
| RNA Seq data                                         | UAB Bioinformatics Core     | GSE180496                         |
| <b>Experimental Models: Organisms/Strains</b>        |                             |                                   |
| Mouse: SCL-tTA-BCR-ABL                               | Daniel Tenen, BIDMC, Boston | N/A                               |
| Mouse: B6.SJL-PtprcaPepcb/BoyCrCrI                   | Charles River Laboratory    | Cat#564                           |
| Mouse: C57BL/6NCr                                    | Charles River Laboratory    | Cat#556                           |
| Mouse: ScfΔ/Δ (Kitltm2.1Sjm/J )                      | Jackson Laboratory          | Stock No: 017861                  |
| Mouse: Scfgfp/+ (Kitltm1.1Sjm/J),                    | Jackson Laboratory          | Stock No: 017860                  |
| <b>Oligonucleotides</b>                              |                             |                                   |
| mKitl qPCR probe                                     | Thermo Fisher Scientific    | Cat#Mm00442972_m1                 |
| mKit qPCR probe                                      | Thermo Fisher Scientific    | Cat#Mm00445212_m1                 |
| mGapdh qPCR probe                                    | Thermo Fisher Scientific    | Cat#Mm99999915_g1                 |
| <b>Software and Algorithms</b>                       |                             |                                   |
| FlowJo software (version 8.5.2)                      | FlowJo                      | RRID:SCR_008520                   |
| BD FACSDiva                                          | BD Biosciences              | RRID:SCR_001456                   |
| GraphPad Prism 7                                     | GraphPad                    | RRID:SCR_002798                   |

**Supplementary Table 1.** GSEA analysis using the C2 gene set

| CML c-Kit <sup>Low</sup> vs c-Kit <sup>High</sup> (positive correlation)    | NES      | FDR q-val   |
|-----------------------------------------------------------------------------|----------|-------------|
| <b>TNFA/NF-KB pathway</b>                                                   |          |             |
| PID_TNF_PATHWAY                                                             | 2.116324 | 0           |
| BIOCARTA_NFKB_PATHWAY                                                       | 1.907848 | 0.006071145 |
| SCHIEDEREIT_IKK_INTERACTING_PROTEINS                                        | 1.849322 | 0.007142454 |
| BIOCARTA_TNFR2_PATHWAY                                                      | 1.747719 | 0.015076728 |
| REACTOME_NFKB_AND_MAP_KINASES_ACTIVATION_MEDIATED_BY_TLR4_SIGNALING_REPERTC | 1.741105 | 0.0157799   |
| REACTOME_TRAF6_MEDIATED_INDUCION_OF_NFKB_AND_MAP_KINASES_UPON_TLR7_8_OR     | 1.720655 | 0.018181676 |
| ZHANG_RESPONSE_TO_IKK_INHIBITOR_AND_TNF_UP                                  | 1.694828 | 0.022621538 |
|                                                                             |          |             |
| <b>IL1/IL2/IL6 signaling</b>                                                |          |             |
| REACTOME_SIGNALING_BY_ILS                                                   | 1.929466 | 0.004898063 |
| BIOCARTA_IL22BP_PATHWAY                                                     | 1.886121 | 0.006695281 |
| BIOCARTA_IL1R_PATHWAY                                                       | 1.876359 | 0.006694058 |
| PID_IL2_1PATHWAY                                                            | 1.872696 | 0.006694001 |
| REACTOME_IL_3_5_AND_GM-CSF_SIGNALING                                        | 1.863667 | 0.007030382 |
| BYSTROEM_CORRELATED_WITH_IL5_DN                                             | 1.86354  | 0.006870613 |
| PID_IL6_7_PATHWAY                                                           | 1.826958 | 0.008023258 |
| PID_IL1_PATHWAY                                                             | 1.792247 | 0.010340108 |
| SIG_IL4RECEPTOR_IN_B_LYPHOCYTES                                             | 1.773158 | 0.011945327 |
| REACTOME_IL1_SIGNALING                                                      | 1.72922  | 0.016938413 |
| ST_INTERLEUKIN_4_PATHWAY                                                    | 1.717131 | 0.018580658 |
| BIOCARTA_IL2_PATHWAY                                                        | 1.709963 | 0.019836994 |
| BIOCARTA_IL6_PATHWAY                                                        | 1.708532 | 0.020122023 |
| WIERENGA_STAT5A_TARGETS_DN                                                  | 1.604818 | 0.04359974  |
|                                                                             |          |             |
| <b>WNT signaling</b>                                                        |          |             |
| BIOCARTA_WNT_PATHWAY                                                        | 1.84486  | 0.006766611 |
| PID_WNT_CANONICAL_PATHWAY                                                   | 1.844276 | 0.006712065 |
| KEGG_WNT_SIGNALING_PATHWAY                                                  | 1.655055 | 0.031312972 |
| ST_WNT_BETA_CATENIN_PATHWAY                                                 | 1.601411 | 0.044222824 |

| CML c-Kit <sup>Low</sup> vs c-Kit <sup>High</sup> (negative correlation) | NES        | FDR q-val   |
|--------------------------------------------------------------------------|------------|-------------|
| <b>Oxidative Phosphorylation</b>                                         |            |             |
| MOOTHA_VOXPPOS                                                           | -2.8651743 | 0           |
| KEGG_OXIDATIVE_PHOSPHORYLATION                                           | -2.8302815 | 0           |
| REACTOME_TCA_CYCLE_AND_RESPIRATORY_ELECTRON_TRANSPORT                    | -2.3308887 | 0           |
| MOOTHA_MITOCHONDRIA                                                      | -1.8251351 | 0.013205438 |
|                                                                          |            |             |
| <b>Cell proliferation</b>                                                |            |             |
| REACTOME_REGULATION_OF_MITOTIC_CELL_CYCLE                                | -2.2418208 | 2.14E-05    |
| REACTOME_CYCLIN_E_ASSOCIATED_EVENTS_DURING_G1_S_TRANSITION               | -2.2367766 | 4.35E-05    |
| GRAHAM_CML_DIVIDING_VS_NORMAL QUIESCENT_UP                               | -1.9096578 | 0.006530864 |
| ZHOU_CELL_CYCLE_GENES_IN_IR_RESPONSE_24HR                                | -1.8824551 | 0.008336465 |
| REACTOME_S_PHASE                                                         | -1.8561777 | 0.010300171 |
| REACTOME_M_G1_TRANSITION                                                 | -1.7986846 | 0.016241971 |
| REACTOME_G1_S_TRANSITION                                                 | -1.7903509 | 0.017485164 |
| GRAHAM_NORMAL QUIESCENT_VS_NORMAL_DIVIDING_DN                            | -1.7653209 | 0.020875871 |
| REACTOME_DNA_REPLICATION                                                 | -1.7505176 | 0.023024708 |
| REACTOME_CELL_CYCLE_CHECKPOINTS                                          | -1.7328736 | 0.025807915 |
| REACTOME_MITOTIC_M_M_G1_PHASES                                           | -1.7038441 | 0.031561214 |
| REACTOME_CELL_CYCLE                                                      | -1.7027274 | 0.031628624 |
| TANG_SENESCENCE_TP53_TARGETS_DN                                          | -1.6922445 | 0.034107182 |
| ISHIDA_E2F_TARGETS                                                       | -1.6921725 | 0.033888545 |
| REACTOME_CELL_CYCLE_MITOTIC                                              | -1.6510344 | 0.043265298 |
| KONG_E2F3_TARGETS                                                        | -1.6403509 | 0.04547825  |
| WHITFIELD_CELL_CYCLE_LITERATURE                                          | -1.5879381 | 0.060423955 |

| CML c-Kit <sup>Low</sup> vs Normal c-Kit <sup>Low</sup> (positive correlation) | NES      | FDR q-val |
|--------------------------------------------------------------------------------|----------|-----------|
| <b>Cell cycle</b>                                                              |          |           |
| EGUCHI_CELL_CYCLE_RB1_TARGETS                                                  | 2.041842 | 0.00312   |
| PID_E2F_PATHWAY                                                                | 2.00988  | 0.00378   |
| KONG_E2F3_TARGETS                                                              | 1.999559 | 0.004074  |
| CHANG_CYCLING_GENES                                                            | 1.953056 | 0.006972  |
| ROSTY_CERVICAL_CANCER_PROLIFERATION_CLUSTER                                    | 1.870724 | 0.016825  |
| REICHERT_MITOSIS_LIN9_TARGETS                                                  | 1.832064 | 0.022796  |
| WHITFIELD_CELL_CYCLE_LITERATURE                                                | 1.809162 | 0.02946   |
| TANG_SENESCENCE_TP53_TARGETS_DN                                                | 1.716452 | 0.055583  |
| ISHIDA_E2F_TARGETS                                                             | 1.710974 | 0.056271  |
| FISCHER_G2_M_CELL_CYCLE                                                        | 1.671032 | 0.068208  |
| SCIAN_CELL_CYCLE_TARGETS_OF_TP53_AND_TP73_DN                                   | 1.642611 | 0.077356  |
| REN_BOUND_BY_E2F                                                               | 1.635987 | 0.076771  |
|                                                                                |          |           |
| <b>Inflammation</b>                                                            |          |           |
| BIOCARTA_IL1R_PATHWAY                                                          | 1.877218 | 0.016093  |
| MANTOVANI_NFKB_TARGETS_UP                                                      | 1.850237 | 0.020109  |
| PHONG_TNF_TARGETS_UP                                                           | 1.800883 | 0.032767  |
| GALINDO_IMMUNE_RESPONSE_TO_ENTEROTOXIN                                         | 1.776825 | 0.038194  |
| BIOCARTA_TNFR1_PATHWAY                                                         | 1.765925 | 0.03964   |
| SCHOEN_NFKB_SIGNALING                                                          | 1.719057 | 0.055504  |
| CROONQUIST_IL6_DEPRIVATION_DN                                                  | 1.717999 | 0.055546  |
| DASU_IL6_SIGNALING_SCAR_UP                                                     | 1.706593 | 0.057743  |
| BIOCARTA_NFKB_PATHWAY                                                          | 1.687181 | 0.06174   |
| MAHAJAN_RESPONSE_TO_IL1A_UP                                                    | 1.664432 | 0.070661  |
| TIAN_TNF_SIGNALING_NOT_VIA_NFKB                                                | 1.654689 | 0.077293  |
| ZHOU_INFLAMMATORY_RESPONSE_FIMA_UP                                             | 1.636054 | 0.077534  |

| CML c-Kit <sup>Low</sup> vs Normal c-Kit <sup>Low</sup> (negative correlation) | NES      | FDR q-val |
|--------------------------------------------------------------------------------|----------|-----------|
| <b>Oxidative phosphorylation</b>                                               |          |           |
| MOOTHA_VOXPPOS                                                                 | -2.6092  | 0         |
| WONG_MITOCHONDRIA_GENE_MODULE                                                  | -2.56294 | 0         |
| REACTOME_TCA_CYCLE_AND_RESPIRATORY_ELECTRON_TRANSPORT                          | -2.47558 | 0         |
| KEGG_OXIDATIVE_PHOSPHORYLATION                                                 | -2.32705 | 7.89E-05  |
| MOOTHA_MITOCHONDRIA                                                            | -1.94712 | 0.006495  |
| MOOTHA_PGC                                                                     | -1.55193 | 0.134756  |
|                                                                                |          |           |
| <b>DNA Damage</b>                                                              |          |           |
| REACTOME_P53_INDEPENDENT_G1_S_DNA_DAMAGE_CHECKPOINT                            | -2.22717 | 2.27E-04  |
| REACTOME_P53_DEPENDENT_G1_DNA_DAMAGE_RESPONSE                                  | -2.19736 | 2.28E-04  |
|                                                                                |          |           |
| <b>interferon</b>                                                              |          |           |
| ZHANG_INTERFERON_RESPONSE                                                      | -2.18809 | 2.82E-04  |
| REACTOME_INTERFERON_ALPHA_BETA_SIGNALING                                       | -1.99925 | 0.003644  |
| RADAEVA_RESPONSE_TO_IFNA1_UP                                                   | -1.8887  | 0.012022  |
| BROWNE_INTERFERON_RESPONSIVE_GENES                                             | -1.88273 | 0.012581  |
| DER_IFN_ALPHA_RESPONSE_UP                                                      | -1.79038 | 0.029329  |
| MOSERLE_IFNA_RESPONSE                                                          | -1.76144 | 0.036749  |
| REACTOME_INTERFERON_SIGNALING                                                  | -1.61588 | 0.093382  |
| BOSCO_INTERFERON_INDUCED_ANTIVIRAL_MODULE                                      | -1.57393 | 0.1226    |
| DER_IFN_GAMMA_RESPONSE_UP                                                      | -1.48814 | 0.170784  |
| SANA_RESPONSE_TO_IFNG_UP                                                       | -1.46686 | 0.186366  |

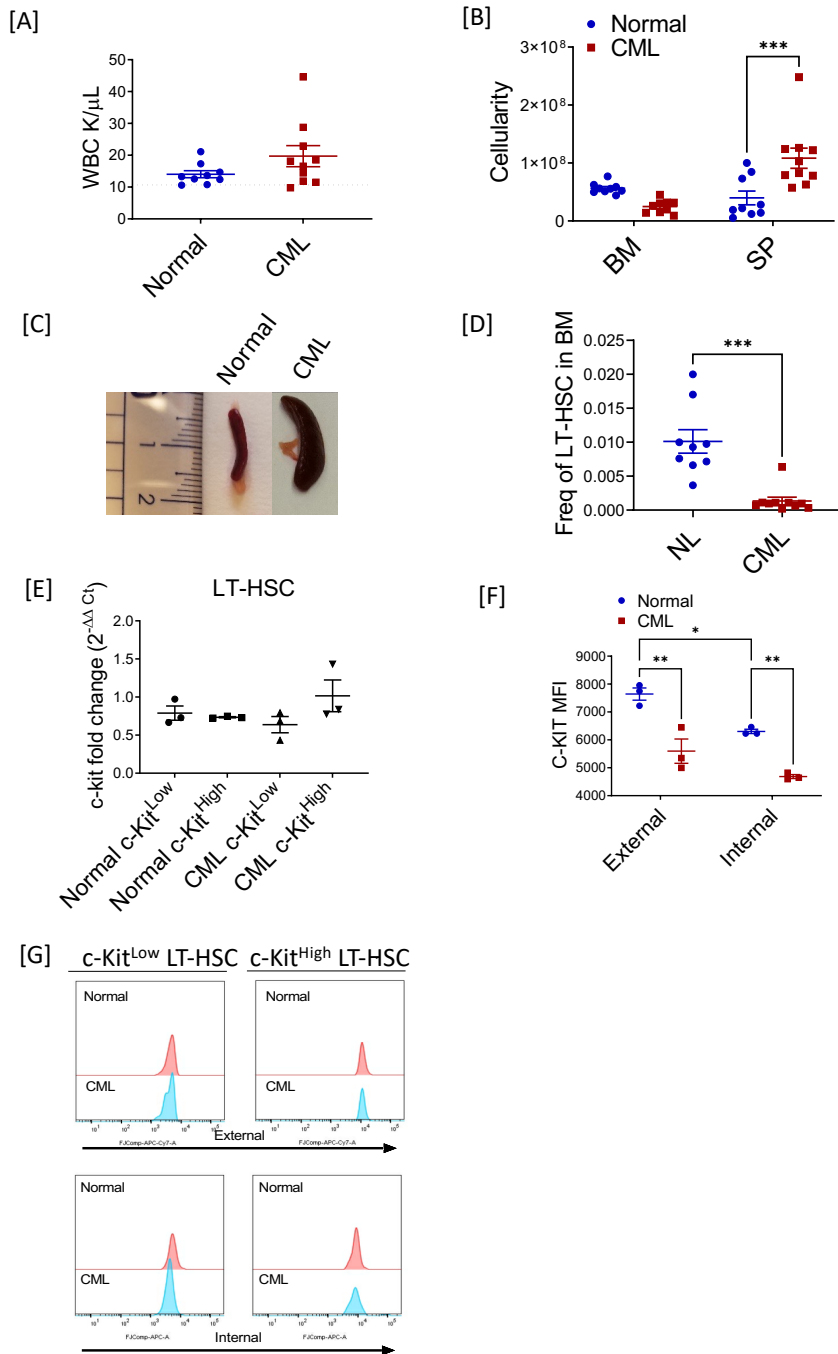

**Supplementary Figure 1. C-Kit<sup>Low</sup> LT-HSCs are increased in CML compared to normal bone marrow.** (Related to Figure 1). Peripheral blood WBC [A], bone marrow cellularity [B] and spleen size [C] in normal control and CML-induced mice. Frequency of donor LT-HSCs of normal control and CML-induced mice [D]. Expression of c-Kit mRNA measured by Q-PCR ( $2^{-\Delta\Delta C_t}$  values) in normal and CML c-Kit<sup>Low</sup> and c-Kit<sup>High</sup> LT-HSC. Data normalized to GAPDH (n=3) [E]. MFI of cell surface and internal c-Kit levels in normal and CML LT-HSCs [F]. Histograms of internal and external c-Kit expression from concatenated normal and CML LT-HSCs stratified as c-Kit<sup>Low</sup> and c-Kit<sup>High</sup> LT-HSCs (n=3 mice) [G]. Data represented as mean  $\pm$  SEM, \* $p < 0.05$ ; \*\* $p < 0.01$ , \*\*\* $p < 0.001$ .

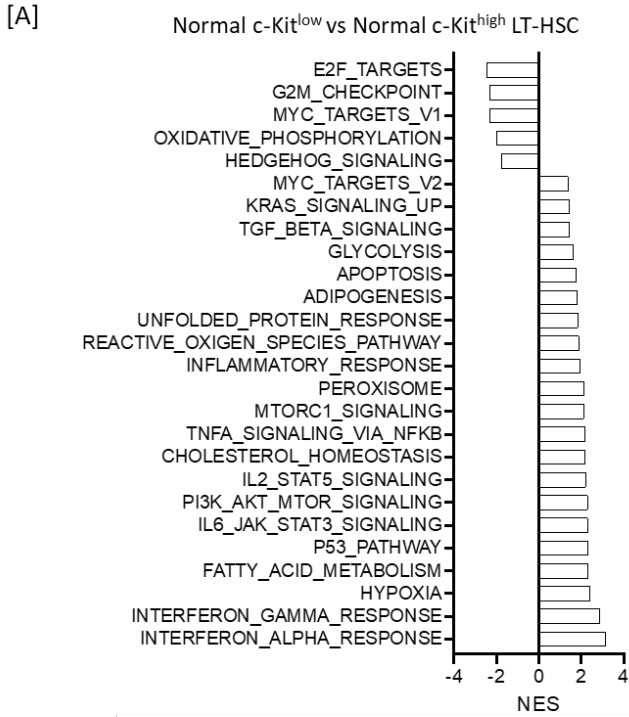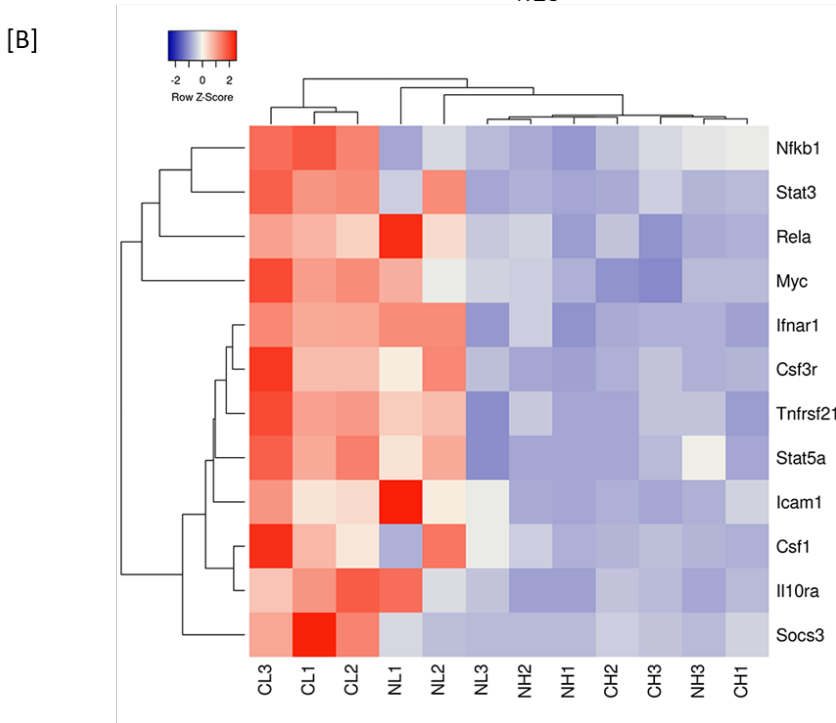

**Supplementary Figure 2. CML c-Kit<sup>Low</sup> LT-HSC exhibit gene signatures characteristic of primitive drug resistant leukemia stem cells** (Related to Figure 2) Normalized enrichment scores (NES) of Hallmark gene sets significantly enriched (FDR<0.05) in Normal c-Kit<sup>Low</sup> LT-HSCs compared to Normal c-Kit<sup>High</sup> LT-HSCs [A]. Heatmap showing inflammatory gene expression in Normal and CML c-Kit<sup>Low</sup> LT-HSCs and c-Kit<sup>High</sup> LT-HSCs [B].

[A]

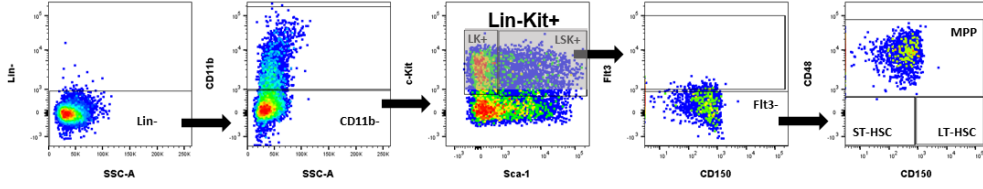

**Supplementary Figure 3. Differential response of Normal and CML LT-HSC to SCF.** (Related to Figure 4)  
A. Gating strategy of cultured mouse stem/progenitor cells.



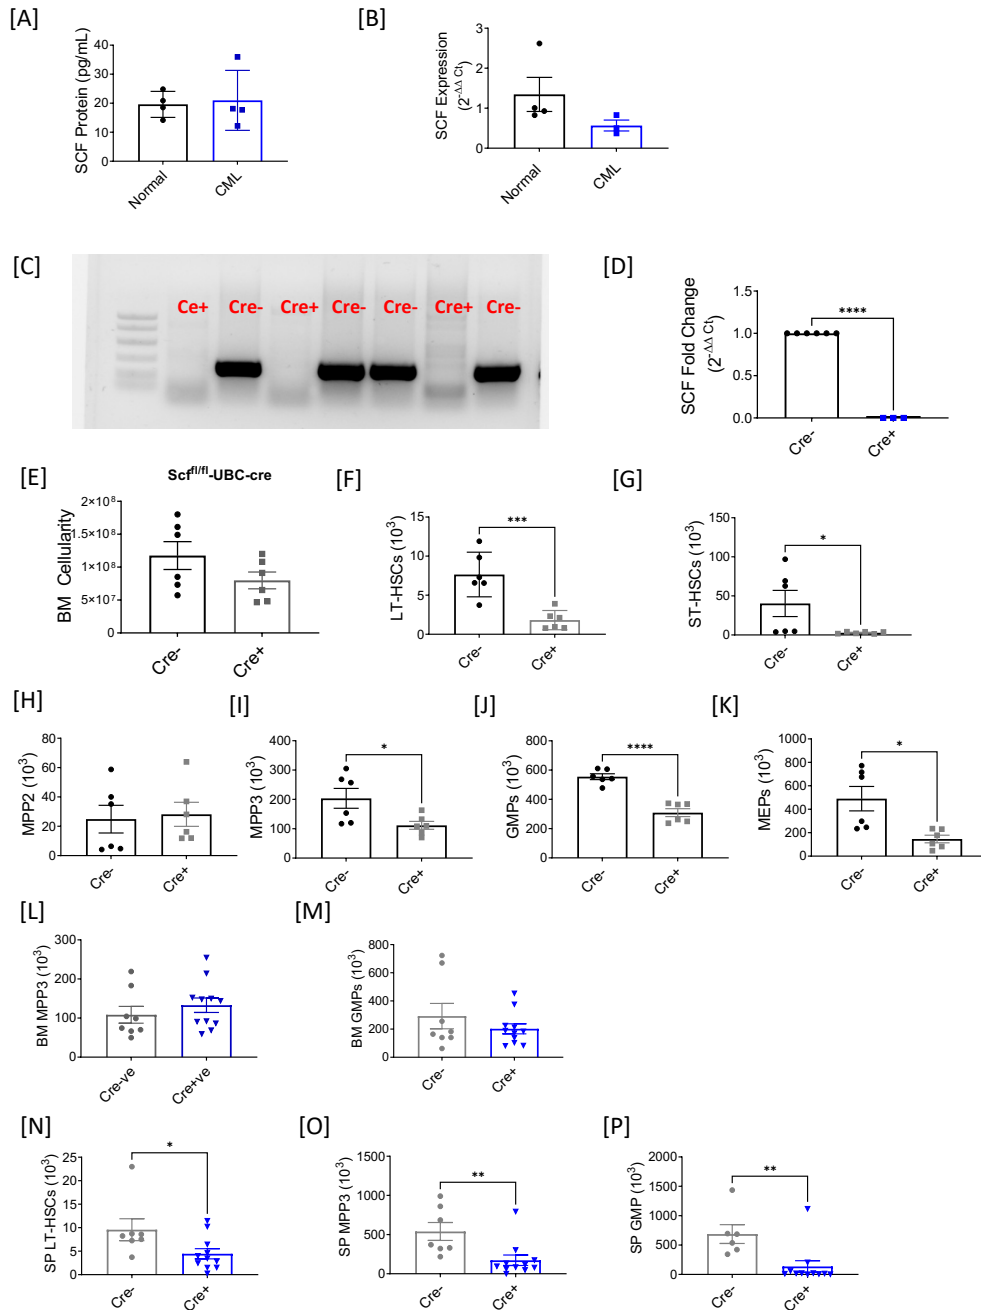

**Supplementary Figure 4. Deletion of SCF alters c-Kit<sup>Low</sup> LT-HSC numbers in vivo.** (Related to Figure 6) ELISA for SCF protein in BM lysates [A], and q-RT-PCR for SCF mRNA expression normalized to GAPDH ( $2^{-\Delta\Delta Ct}$  values) in whole murine bone marrow cells, from normal and SCL-tTA-BCR-ABL mice (n=4) [B]. Genomic PCR for Scf excision [C] and q-RT-PCR for Scf mRNA expression in BM cells [D] from cre- and cre+ Scf<sup>fl/fl</sup>/Ubc-cre mice. Total number of bone marrow cells [E], LT-HSC [F], ST-HSCs [G], MPP2 [H], MPP3 [I], GMP [J], and MEP [K] cells in cre- (n=3-6) and cre+ (n=3-6) Scf<sup>fl/fl</sup>/Ubc-cre mice. Total number of donor bone marrow MPP3 [L], and GMP [M], and donor spleen LT-HSCs [N], MPP3 [O], and GMP [P], 14 weeks post transplantation of CML bone marrow cells into lethally irradiated cre- (n=3-6) and cre+ (n=8-11) Scf<sup>fl/fl</sup>/Ubc-cre mice. Data represented as mean  $\pm$  SEM, \*p<0.05; \*\*p<0.01, \*\*\*p<0.001, \*\*\*\*p<0.0001

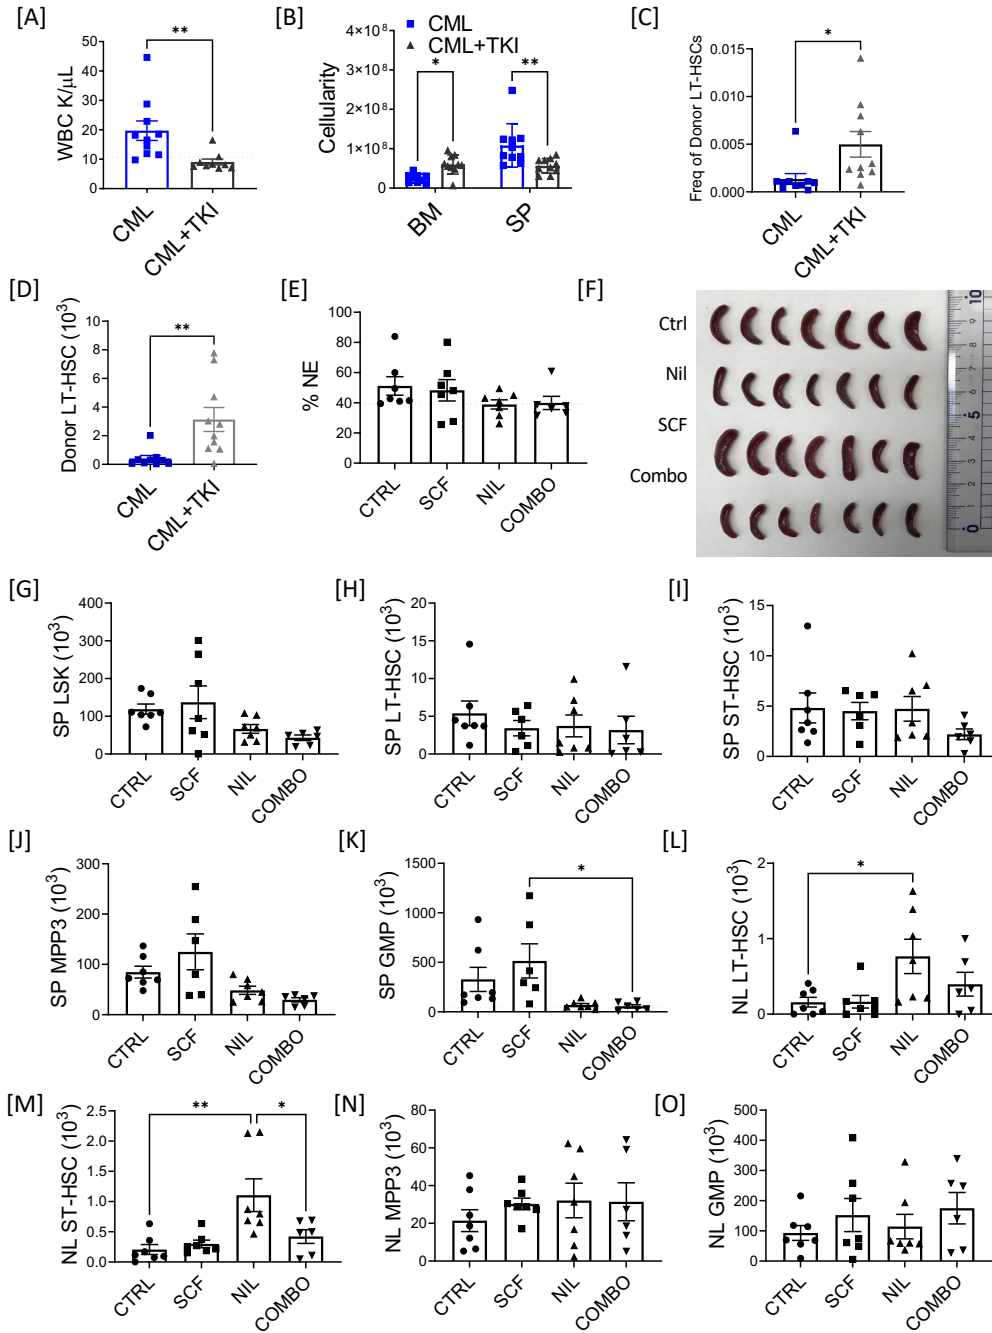

**Supplementary Figure 5. Effect of TKI-treatment on murine leukemic LT-HSC (Related to Figure 7)** Peripheral blood WBC [A] and bone marrow cellularity [B] in CML mice with and without nilotinib (TKI)-treatment. The dotted line represents the upper limit of normal range. Frequency of CML LT-HSC [C], and number of CML LT-HSC [D] in CML mice with and without nilotinib (TKI) treatment. CML-induced mice were treated with SCF, Nilotinib, or Combo for 14 days. Percentage of Neutrophils [E] in the blood post treatment. Spleen size [F], and total number donor CML spleen LSK [G], LT-HSC [H], ST-HSC, [I], MPP3, [J] and GMP[K]. Total number of normal donor bone marrow LT-HSC [L], ST-HSCs [M], MPP3 [N], GMP [O], of control (CTRL), SCF-treated (SCF), Nilotinib-treated (NIL) or SCF and Nilotinib-treated (COMBO) mice. n=6-7. Data represented as mean  $\pm$  SEM, \*p<0.05, \*\*p<0.01.
